# Supplementary material for: Tandem hnRNP A1 RNA recognition motifs act in concert to repress the splicing of survival motor neuron exon 7
Source: eLife. 2017 Jun 26;6:e25736. doi: 10.7554/eLife.25736 (PMC5503513; doi:10.7554/eLife.25736)
Supplement: Figure 5—source data 1. — DOI: http://dx.doi.org/10.7554/eLife.25736.023 [file elife-25736-fig5-data1.xlsx]

## Sheet: Sheet1
Figure 5 - source data 1. PAGE quantification for SMN exon 7 inclusion (%)
		replicate
minigene	pCGFLAG hnRNP A1	1	2	3	4		mean
pSMN1	0.5 ug -	88.8347	93.7139	95.6681			92.7389
pSMN1	0.5 ug WT	8.746	7.51195	2.82583			6.36126
pSMN1	0.5 ug INT1	41.1234	47.2535	39.3222			42.5664
pSMN1	0.5 ug INT2	28.44	34.2357	21.9294			28.2017
pSMN1	0.5 ug INT3	25.8645	33.393	17.2074			25.4883
pSMN1	0.5 ug R1r2	86.9752	89.1211	94.5965			90.2309
pSMN1	0.5 ug r1R2	78.7199	79.5212	90.9718			83.0709
pSMN1	1 ug -	91.539	86.0704	92.4574			90.0223
pSMN1	1 ug WT	2.81006	11.95	1.55851			5.43951
pSMN1	1 ug INT1	32.2133	40.2545	36.1083			36.192
pSMN1	1 ug INT2	17.8027	33.831	19.3473			23.6603
pSMN1	1 ug INT3	15.0108	32.1886	18.0695			21.7563
pSMN1	1 ug R1r2	96.3104	81.8761	95.3908			91.1924
pSMN1	1 ug r1R2	89.9761	69.4429	86.9721			82.1304
pSMN1	2 ug -	75.3699	83.443	90.1527			82.9885
pSMN1	2 ug WT	19.468	6.31871	2.20195			9.32956
pSMN1	2 ug R1r2	79.9403	90.9291	94.5309			88.4668
pSMN1	2 ug r1R2	69.9285	70.1708	82.866			74.3218
pSMN2	-	37.1263	37.8542	33.3891	33.8705		35.56
pSMN2	WT	23.7634	26.367	23.3761	23.3688		24.2188
pSMN2	R1r2	47.4636	50.7892	52.5298	45.3812		49.041
pSMN2	r1R2	38.5845	42.8241	40.2056	37.4638		39.7695
pSMN2 ISS-N1-13a-24a	-	61.8616	60.6128	59.4705			60.6483
pSMN2 ISS-N1-13a-24a	WT	45.2319	43.3375	46.5453			45.0382
pSMN2 ISS-N1-13a-24a	R1r2	68.7957	68.6794	70.0266			69.1672
pSMN2 ISS-N1-13a-24a	r1R2	54.5125	55.0464	55.4026			54.9872
pSMN2 ISS-N1-g13a	-	49.8483	47.7203	47.4038			48.3241
pSMN2 ISS-N1-g13a	WT	35.4468	31.3528	28.2204			31.6733
pSMN2 ISS-N1-g13a	R1r2	59.8044	59.067	57.7039			58.8584
pSMN2 ISS-N1-g13a	r1R2	45.0983	49.5141	42.5884			45.7336
pSMN2 ISS-N1-g24a	-	47.6299	46.2933		44.1681		46.0304
pSMN2 ISS-N1-g24a	WT	29.0598	29.6608		30.2156		29.6454
pSMN2 ISS-N1-g24a	R1r2	56.6927	55.6301		51.5768		54.6332
pSMN2 ISS-N1-g24a	r1R2	45.8321	49.0131		45.2628		46.7027
pSMN2	-	36.938	34.5018	33.7703			35.07
pSMN2	WT	25.1307	20.9221	18.2824			21.4451
pSMN2 ISS-N1 -2	-	36.4566	30.7645	32.1017			33.1076
pSMN2 ISS-N1 -2	WT	21.3634	19.4248	17.4938			19.4273
pSMN2 ISS-N1 -4	-	34.6072	31.3545	31.2343			32.3987
pSMN2 ISS-N1 -4	WT	21.7164	18.9663	17.4741			19.3856
pSMN2 ISS-N1 -6	-	43.3753	42.0363	39.5305			41.6474
pSMN2 ISS-N1 -6	WT	24.9129	22.7837	18.3258			22.0075
pSMN2 ISS-N1 -8	-	43.1014	45.1879	41.3897			43.2263
pSMN2 ISS-N1 -8	WT	25.402	22.9487	19.4256			22.5921
pSMN2	1 ug -	33.5572	36.2058	31.9941			33.919
pSMN2	1 ug WT	11.0462	28.5068	20.2483			19.9338
pSMN2	1 ug R1r2	52.4933	50.8135	51.2327			51.5132
pSMN2	1 ug r1R2	40.215	39.3544	38.2255			39.265
pSMN2	0.5 ug R1r2 + 0.5 ug r1R2	39.9397	36.7501	34.5628			37.0842
pSMN2	0.5 ug -	33.6128	35.6265	29.7003			32.9798
pSMN2	0.5 ug WT	25.6661	26.6495	19.6199			23.9785
pSMN2	0.5 ug R1r2	50.7272	43.5361	44.512			46.2584
pSMN2	0.5 ug r1R2	38.9741	34.6323	36.0232			36.5432
