# Supplementary material for: Tandem hnRNP A1 RNA recognition motifs act in concert to repress the splicing of survival motor neuron exon 7
Source: eLife journal article supplement (doi:10.7554/elife.25736), 2017-06-26
Supplement: supp [file elife_poa_e25736_Figure_3_figure_supplement_1.pdf › elife_poa_e25736_Figure_3_figure_supplement_1.pdf]

**A**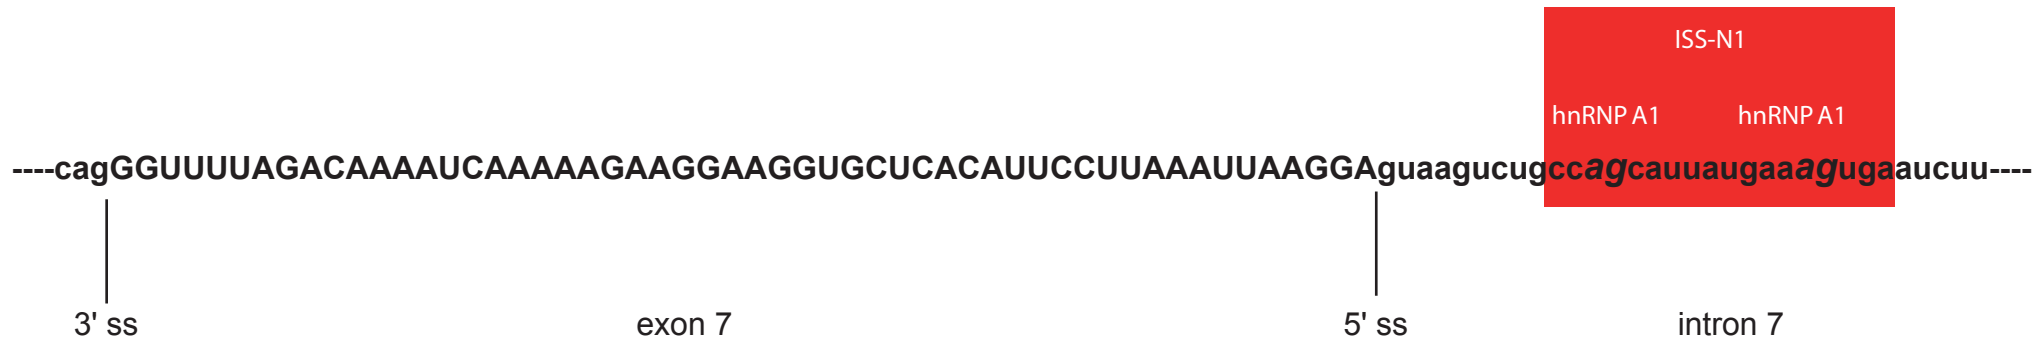**B**

|               |                               |
|---------------|-------------------------------|
| ISS-N1        | 5'- GGACCAGCAUUAUGAAAGUGA -3' |
| ISS-N1-c14g   | 5'- GGACCAGGAUUAUGAAAGUGA -3' |
| ISS-N1-u25g   | 5'- GGACCAGCAUUAUGAAAGGGA -3' |
| ISS-N1-14g25g | 5'- GGACCAGGAUUAUGAAAGGGA -3' |
