# Supplementary material for: Tandem hnRNP A1 RNA recognition motifs act in concert to repress the splicing of survival motor neuron exon 7
Source: eLife. 2017 Jun 26;6:e25736. doi: 10.7554/eLife.25736 (PMC5503513; doi:10.7554/eLife.25736)
Supplement: Table 3—source data 1. — DOI: http://dx.doi.org/10.7554/eLife.25736.011 [file elife-25736-table3-data1.xlsx]

## Sheet: Sheet1
Table 3 – source data 1. ITC data for evaluation of RNA specificity and affinity of the RRMs of hnRNP A1.
Protein	RNA	c(protein) [uM]	c(RNA) [uM]		N	N SD	Ka	Ka SD		Kd [nM]	Kd SD		ΔH	ΔH SD	ΔS
RRM1 wt	UUAGGUC	100	10		0.988	0.0021	3470000	84000		288.184	6.97622		-30100	90.2	-69.4
RRM1 wt	UUAGGUC	100	10		0.93	0.0024	3430000	98000		291.545	8.32986		-27100	95.6	-59.5
RRM1 F23A	UUAGGUC	115	10		1.07	0.0021	4450000	120000		224.719	6.05984		-26300	73.5	-56.4
RRM1 F23A	UUAGGUC	115	10		0.978	0.0019	5180000	140000		193.05	5.21757		-27800	74.7	-60.8
RRM1 D42A	UUAGGUC	100	10		0.923	0.0024	1270000	25000		787.402	15.5		-26800	98.1	-60.5
RRM1 R92A	UUAGGUC	100	10		1.08	0.005	351000	9300		2849	75.4864		-29700	249	-72.7
RRM1 wt	UAGGUC	110	10		0.974	0.0029	1600000	38000		625	14.8438		-28000	112	-64
RRM1 F23A	UAGGUC	115	10		0.906	0.0029	1660000	42000		602.41	15.2417		-26100	114	-57.7
RRM1 wt	UUUUAGGUC	110	10		0.913	0.0014	6290000	140000		158.983	3.53856		-30600	68.3	-69.9
RRM1 F23A	UUUUAGGUC	116	10		0.912	0.0018	7680000	230000		130.208	3.89947		-2670	74.1	-56.4
RRM1 wt	UCAGGUC	100	10		0.993	0.0039	1840000	63000		543.478	18.6082		-24500	135	-52.1
RRM1 wt	UUAGUU	100	10		0.965	0.02	167000	9400		5988.02	337.05		-35070	1150	-91.8
RRM1 D42A	UUAGUU	100	10		1.07	0.0056	372000	11000		2688.17	79.489		-29990	279	-73.4
RRM1 R92A	UUAGUU	100	10		1		43400	3000		23041.5	1592.73		-30210	1220	-78.4
RRM1 wt	UCAGUU				0.957	0.0049	78100	4200		12804.1	688.569		-28800	559	-72.8
RRM1 wt	UAAGUU	120	10		0.973	0.013	217000	8600		4608.29	182.633		-27800	566	-67.2
RRM1 wt	UGAGUU	120	10		0.987	0.0067	290000	6900		3448.28	82.0452		-28500	288	-69
RRM2 wt	UCAGUU				1.04	0.0039	1850000	63000		540.541	18.4076		-27000	138	-60.3
RRM2 R140A	UCAGUU	100	10		1.07	0.0047	401000	11000		2493.77	68.4075		-26500	206	-61.8
RRM2 Y167F	UCAGUU	125	10		0.994	0.0033	1950000	57000		512.821	14.9901		-27300	122	-61.1
RRM2 E176Q	UCAGUU	100	10		1.01	0.0032	4220000	150000		236.967	8.42299		-24820	111	-51.6
RRM2 M186A	UCAGUU	100	10		0.96	0.0049	615000	17000		1626.02	44.9468		-24360	182	-53.9
RRM2 wt	UUAGUU	100	10		1.04	0.0031	7980000	400000		125.313	6.28137		-28100	124	-61.1
RRM2 R140A	UUAGUU	100	10		1.1	0.0034	2310000	73000		432.9	13.6804		-25720	107	-55.7
RRM2 Y167F	UUAGUU	100	10		0.947	0.003	8490000	460000		117.786	6.38179		-30900	143	-70.2
RRM2 E176Q	UUAGUU	100	10		0.988	0.0028	3500000	120000		285.714	9.79592		-27240	105	-59.9
RRM2 M186A	UUAGUU	100	10		0.995	0.0025	3960000	120000		252.525	7.65228		-23420	79.7	-47.1
RRM2 wt	UAGGUC	100	10		1.01	0.0036	10200000	680000		98.0392	6.53595		-26770	141	-56.2
RRM2 R140A	UAGGUC	100	10		1.01	0.0038	1460000	45000		684.932	21.1109		-25260	132	-55.1
RRM2 E176Q	UAGGUC	100	8		1.07	0.0035	4400000	170000		227.273	8.78099		-27310	134	-59.7
RRM2 wt	UUAGGUC	100	10		1.09	0.0055	15600000	1900000		64.1026	7.80736		-26730	219	-55.3
RRM2 R140A	UUAGGUC	100	10		1.01	0.0027	5120000	190000		195.312	7.24792		-2.705	106	-58.5
RRM2 E176Q	UUAGGUC	100	10		1.01	0.0056	8590000	840000		116.414	11.3839		-27700	233	-59.7
RRM2 wt	UCAGGUC	100	10		1.01	0.0043	7740000	540000		129.199	9.01388		-25430	156	-52.4
RRM2 R140A	UCAGGUC	100	10		0.918	0.0029	1160000	25000		862.069	18.5791		-25360	110	-55.9
RRM2 E176Q	UCAGGUC	100	8		0.926	0.0053	7550000	610000		132.45	10.7013		-27290	220	-58.6
RRM2 wt	UAAGUU	100	10		1.04	0.0031	1840000	49000		543.478	14.4731		-23630	99.1	-49.3
RRM2 R140A	UAAGUU	100	10		0.967	0.022	303000	27000		3300.33	294.089		-23690	851	-53.1
RRM2 E176Q	UAAGUU	100	5		0.938	0.0061	2330000	93000		429.185	17.1305		-26220	240	-57.4
RRM2 wt	UGAGUU	100	10		0.926	0.0029	1830000	49000		546.448	14.6317		-27910	120	-63.4
RRM2 R140A	UGAGUU	100	10		0.977	0.0049	378000	13000		2645.5	90.9829		-25300	256	-57.9
RRM2 E176Q	UGAGUU	100	5		1.03	0.0047	3090000	110000		323.625	11.5206		-26320	170	-57.1
Out-put values from single-binding site (1:1) model non-linear squares fitting performed with Origin 7.0 (MicroCal Inc.). For an easier understanding the Kd has directly been calculated from the fitted Ka value.
The RNA was the titrate and the protein the titrant. Used concentrations are given.
N: number of sites
