# Supplementary material for: Tandem hnRNP A1 RNA recognition motifs act in concert to repress the splicing of survival motor neuron exon 7
Source: eLife. 2017 Jun 26;6:e25736. doi: 10.7554/eLife.25736 (PMC5503513; doi:10.7554/eLife.25736)
Supplement: Table 4—source data 2. — DOI: http://dx.doi.org/10.7554/eLife.25736.014 [file elife-25736-table4-data2.xlsx]

## Sheet: Sheet1
Table 4 – source data 2. ITC data for evaluation of RNA specificity and affinity of the RRMs of hnRNP A1 in the context of UP1.
Protein	RNA	c(protein) [uM]	c(RNA) [uM]		N	N SD	Ka	Ka SD		Kd [nM]	Kd SD		ΔH	ΔH SD	ΔS
UP1 R1r2	UUAGUUC	112	10		1.02	0.0017	22200000	1000000		45.045	2.02906		-29700	83.5	-64.5
UP1 R1r2	UCAGGUC	100	10		0.974	0.0031	5850000	270000		170.94	7.88955		-23200	105	-45.5
UP1 R1r2	UUAGUU	112	10		1.05	0.003	9490000	510000		105.374	5.66289		-28900	125	-63.3
UP1 R1r2	UCAGUU	100	10		1.11	0.0056	1730000	81000		578.035	27.0641		-25000	179	-53.8
UP1 R1r2	UAAGUU	120	10		1.05	0.0057	1520000	67000		657.895	28.9993		-23610	181	-49.6
UP1 R1r2	UGAGUU	100	10		1.09	0.0067	1530000	89000		653.595	38.0196		-26040	237	-57.6
RRM1	UUAGUUC	100	10		0.93	0.0024	3430000	98000		291.545	8.32986		-27120	95.6	-59.5
RRM1	UUAGUUC	100	10		0.988	0.0021	3470000	84000		288.184	6.97622		-30110	90.2	-69.4
RRM1	UCAGGUC	100	10		0.993	0.0039	1840000	63000		543.478	18.6082		-24480	135	-52.1
RRM1	UUAGUU	100	10		0.965	0.02	167000	9400		5988.02	337.05		-35070	1150	-91.8
RRM1	UCAGUU	100	10		0.957	0.0049	78100	4200		12804.1	688.569		-28840	559	-72.8
RRM1	UAAGUU	120	10		0.973	0.013	217000	8600		4608.29	182.633		-27780	566	-67.2
RRM1	UGAGUU
UP1 r1R2	UUAGUUC	113	10		1.02	0.0019	17800000	800000		56.1798	2.52493		-29470	86.8	-64
UP1 r1R2	UCAGGUC	100	10		0.902	0.0027	5620000	230000		177.936	7.28208		-27180	114	-58.8
UP1 r1R2	UUAGUU	113	10		0.993	0.0022	7060000	240000		141.643	4.81506		-29840	93.5	-67.1
UP1 r1R2	UCAGUU	100	10		1.05	0.0043	1570000	55000		636.943	22.3133		-26750	147	-59.9
UP1 r1R2	UAAGUU	120	10		1.01	0.0045	1460000	50000		684.932	23.4566		-25520	153	56
UP1 r1R2	UGAGUU	120	10		1.04	0.0055	1600000	69000		625	26.9531		-25650	190	-56.2
RRM2	UUAGUUC	100	10		1.09	0.0055	15600000	1900000		64.1026	7.80736		-26730	219	-55.3
RRM2	UCAGGUC	100	10		1.01	0.0043	7740000	540000		129.199	9.01388		-25430	156	-52.4
RRM2	UUAGUU	100	10		1.04	0.0031	7980000	400000		125.313	6.28137		-28100	124	-61.1
RRM2	UCAGUU	100	10		1.04	0.0039	1850000	63000		540.541	18.4076		-26970	138	-60.3
RRM2	UAAGUU	100	10		1.04	0.0031	1840000	49000		543.478	14.4731		-23630	99.1	-49.3
RRM2	UGAGUU	100	10		0.926	0.0029	1830000	49000		546.448	14.6317		-27910	120	-63.4
Out-put values from single-binding site (1:1) model non-linear squares fitting performed with Origin 7.0 (MicroCal Inc.). For an easier understanding the Kd has directly been calculated from the fitted Ka value.
The RNA was the titrate and the protein the titrant. Used concentrations are given.
N: number of sites
UP1 R1r2: UP1 F108A F150A - RRM2 RNA binding abolished
UP1 r1R2: UP1 F17A F59A - RRM1 RNA binding abolished
