# Supplementary figures and images for: Tandem hnRNP A1 RNA recognition motifs act in concert to repress the splicing of survival motor neuron exon 7
Source: eLife journal article supplement (doi:10.7554/elife.25736), 2017-06-26

**RRM1**

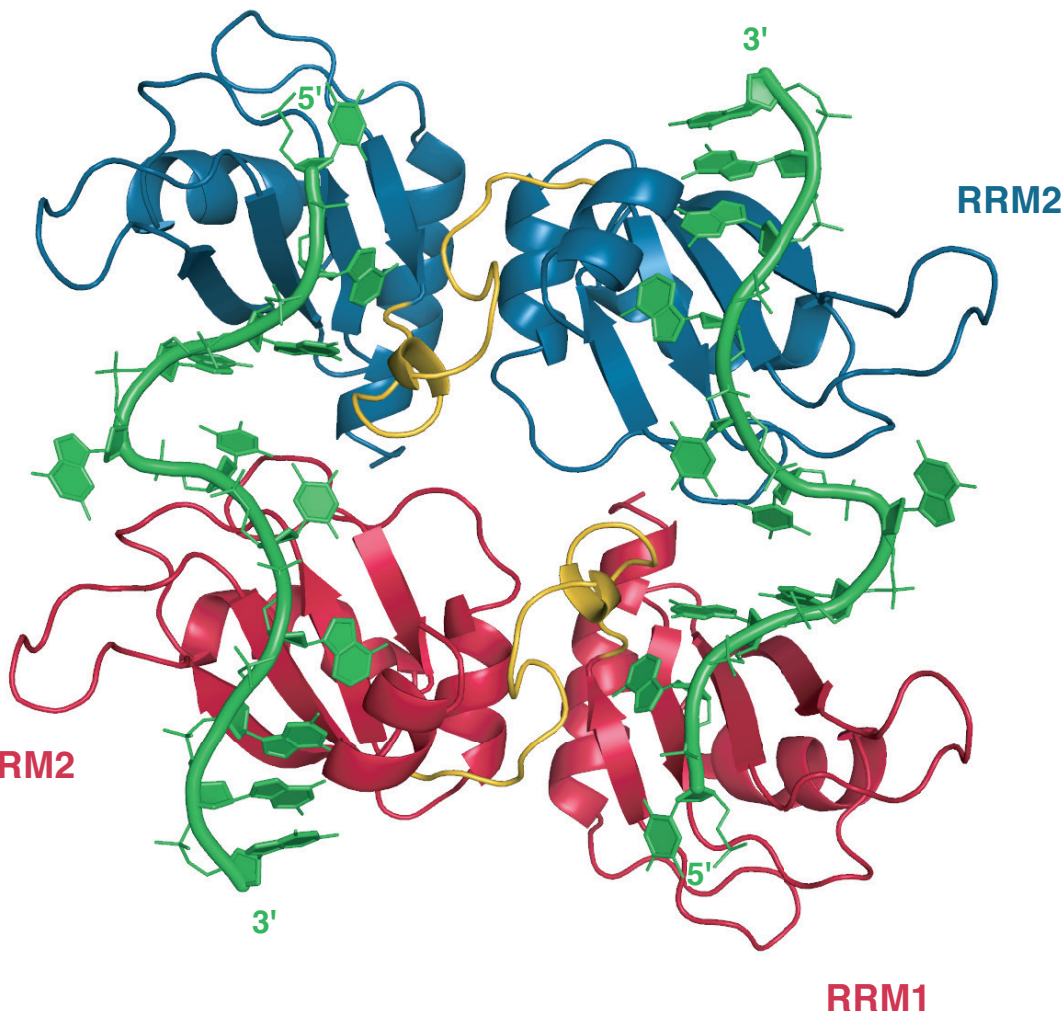

Supplement: supp [file elife_poa_e25736_Appendix_1_figure_1.pdf › elife_poa_e25736_Appendix_1_figure_1.pdf]

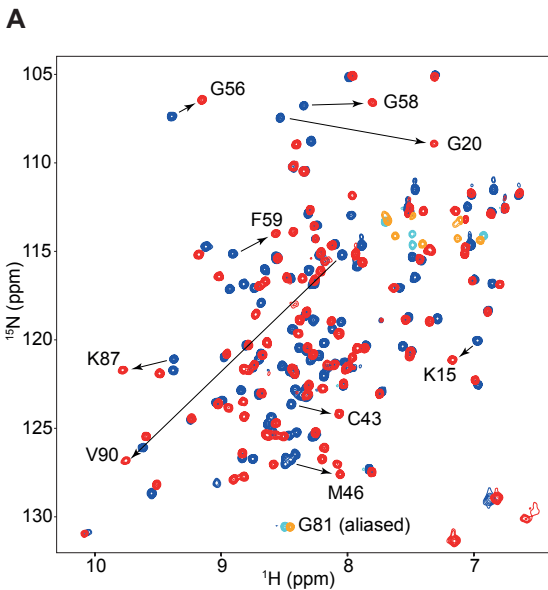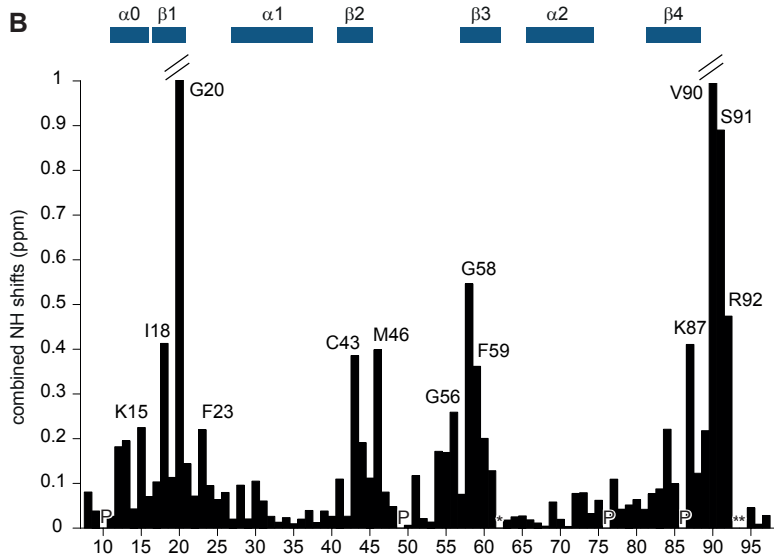

Figure 1 - figure supplement 1

Supplement: supp [file elife_poa_e25736_Figure_1_figure_supplement_1.pdf › elife_poa_e25736_Figure_1_figure_supplement_1.pdf]

**A**

### A3-G4 in RRM1

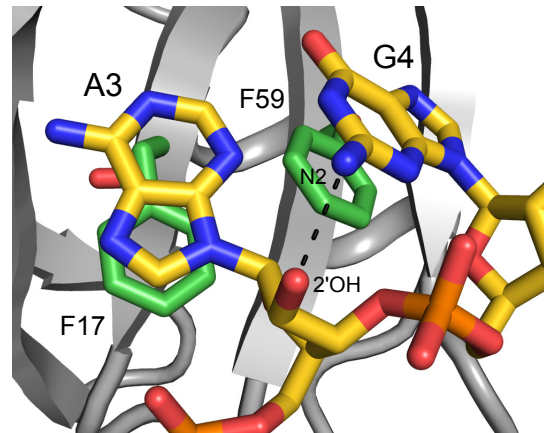**B**

### A3-G4 in RRM2

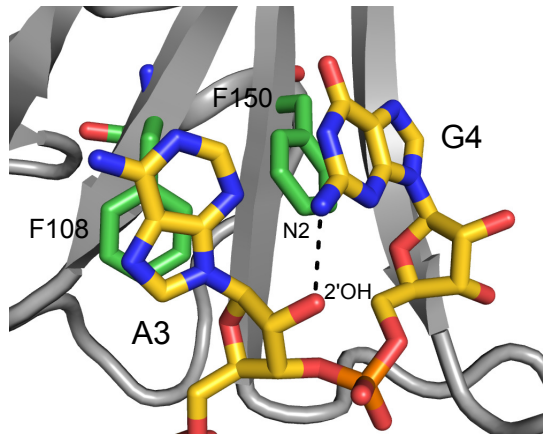

Supplement: supp [file elife_poa_e25736_Figure_1_figure_supplement_2.pdf › elife_poa_e25736_Figure_1_figure_supplement_2.pdf]

**A**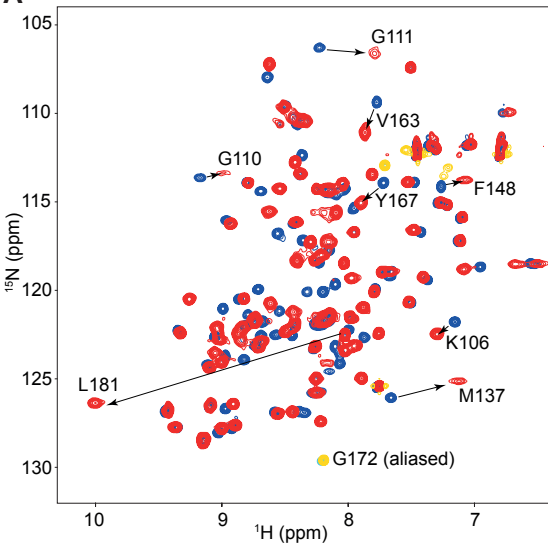**B**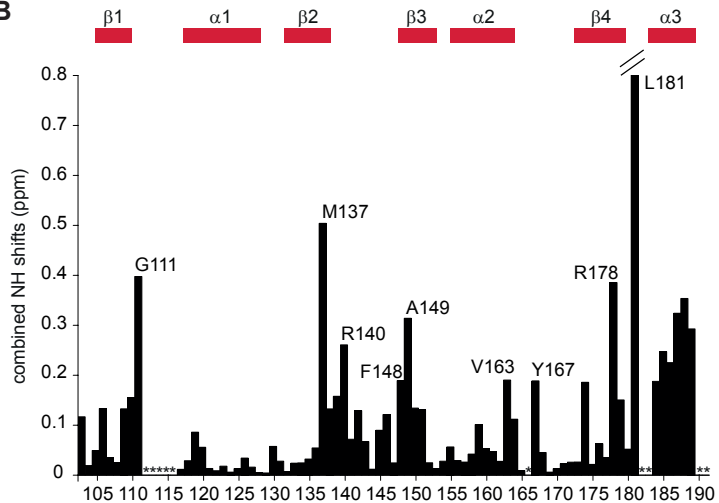

Figure 2 - figure supplement 1

Supplement: supp [file elife_poa_e25736_Figure_2_figure_supplement_1.pdf › elife_poa_e25736_Figure_2_figure_supplement_1.pdf]

**A**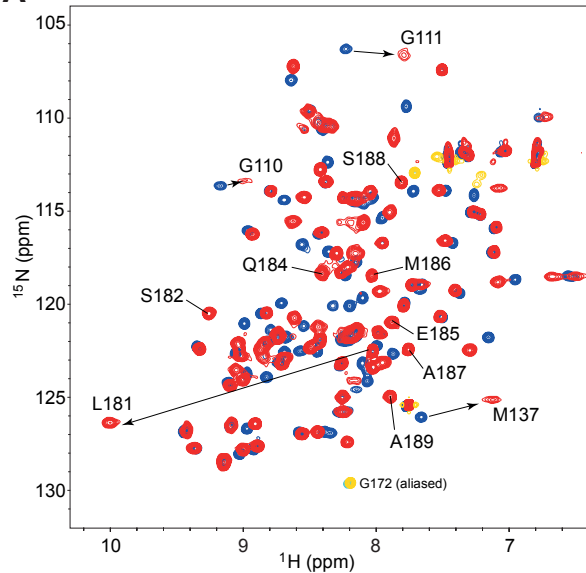

RRM2 + UCAGUU

**B**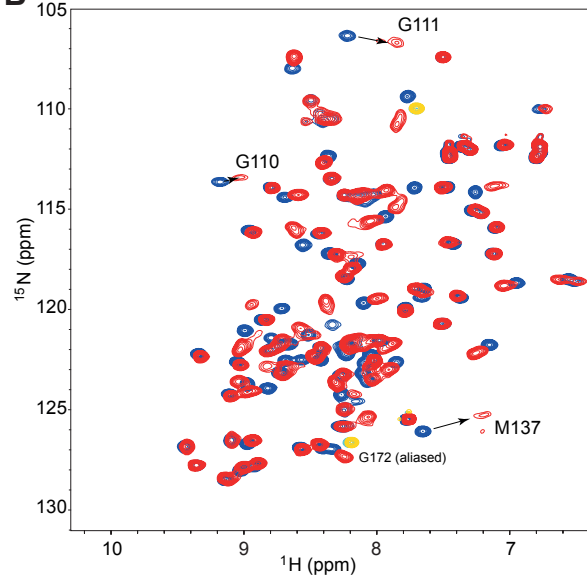

RRM2 M186A + UCAGUU

Supplement: supp [file elife_poa_e25736_Figure_2_figure_supplement_2.pdf › elife_poa_e25736_Figure_2_figure_supplement_2.pdf]

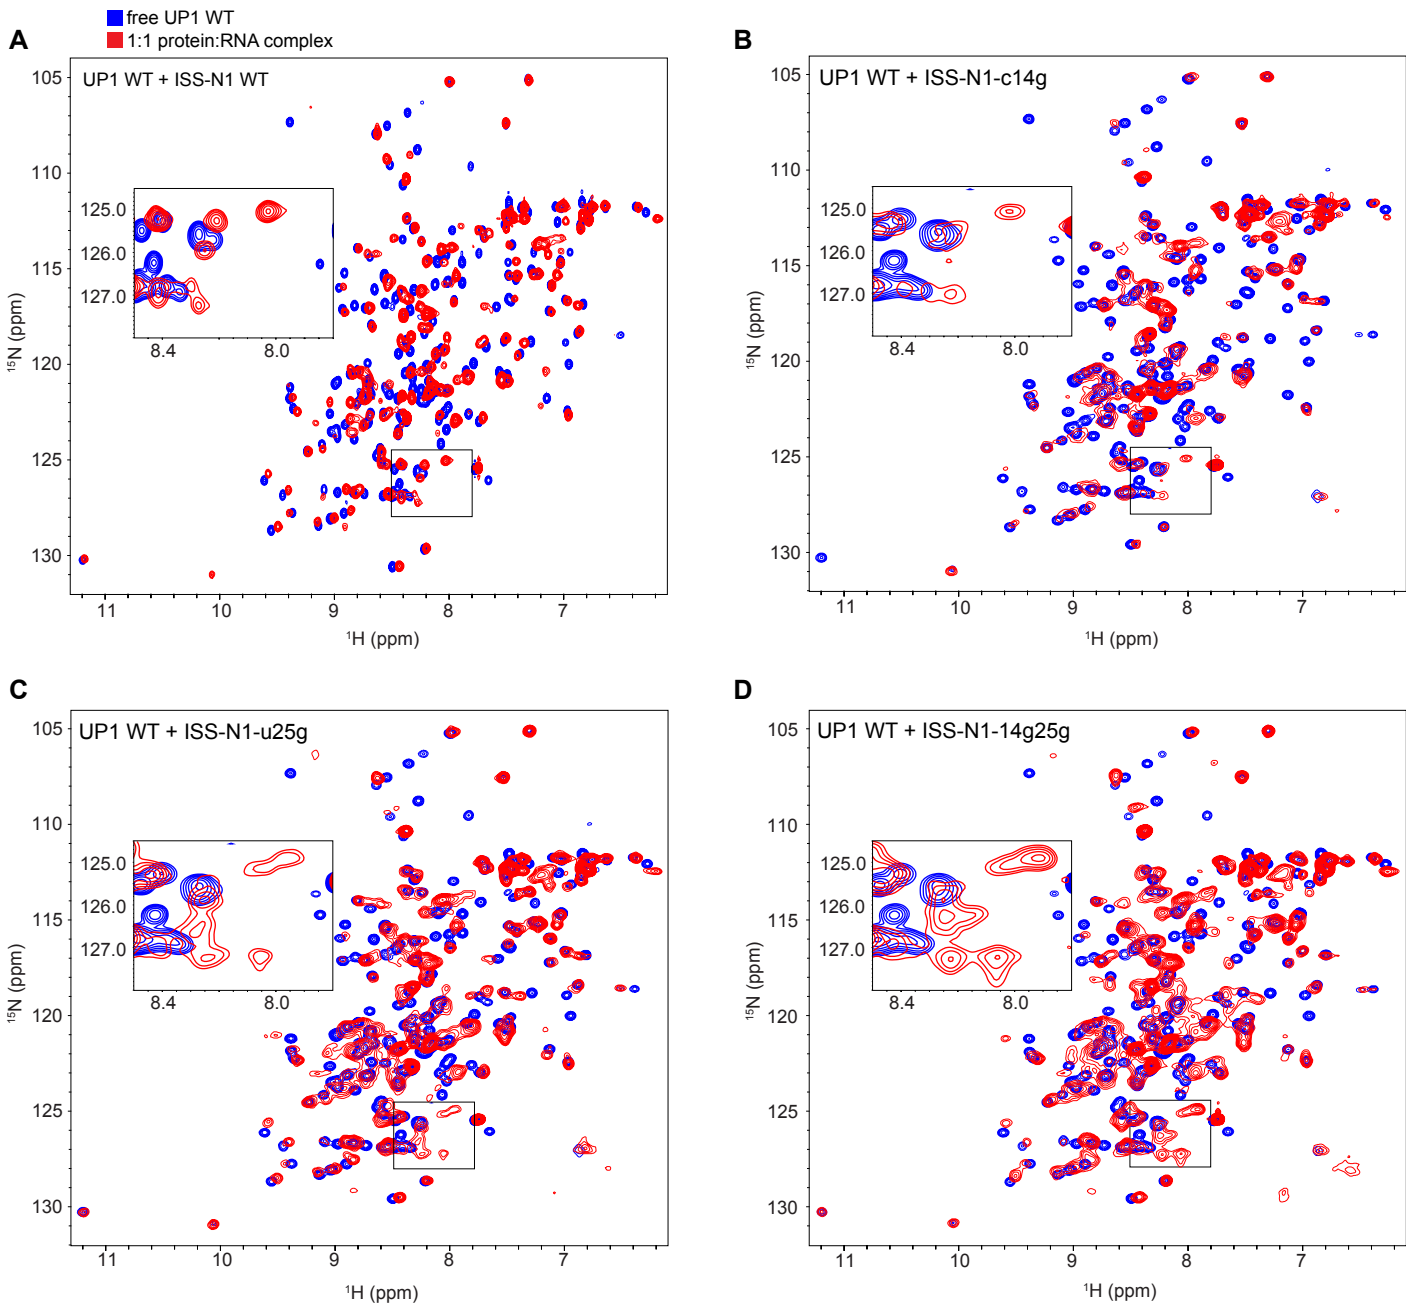

Figure 3 - figure supplement 2

Supplement: supp [file elife_poa_e25736_Figure_3_figure_supplement_2.pdf › elife_poa_e25736_Figure_3_figure_supplement_2.pdf]

**A**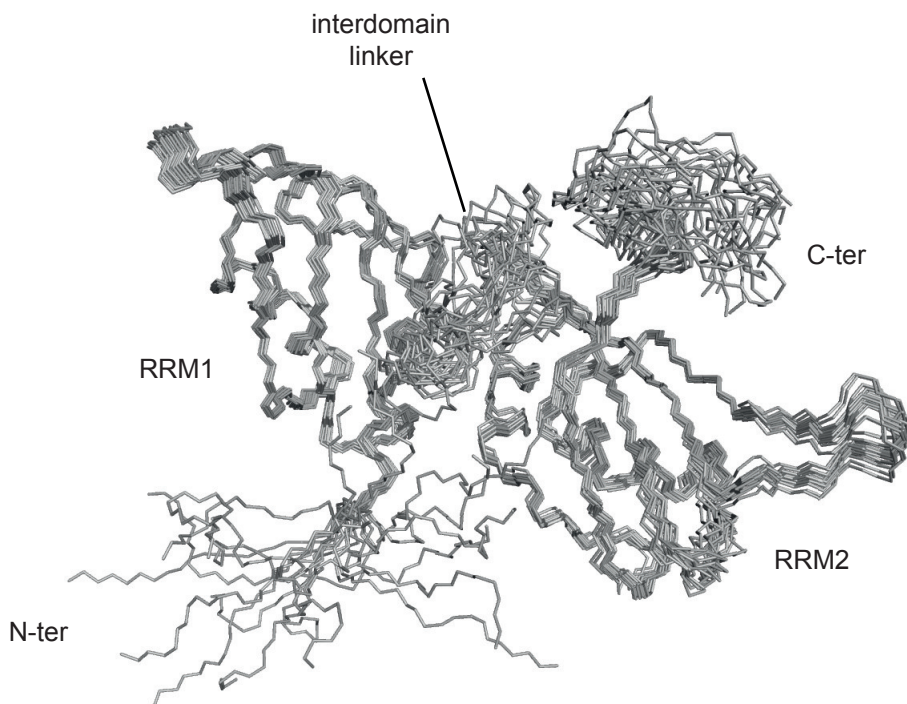**B**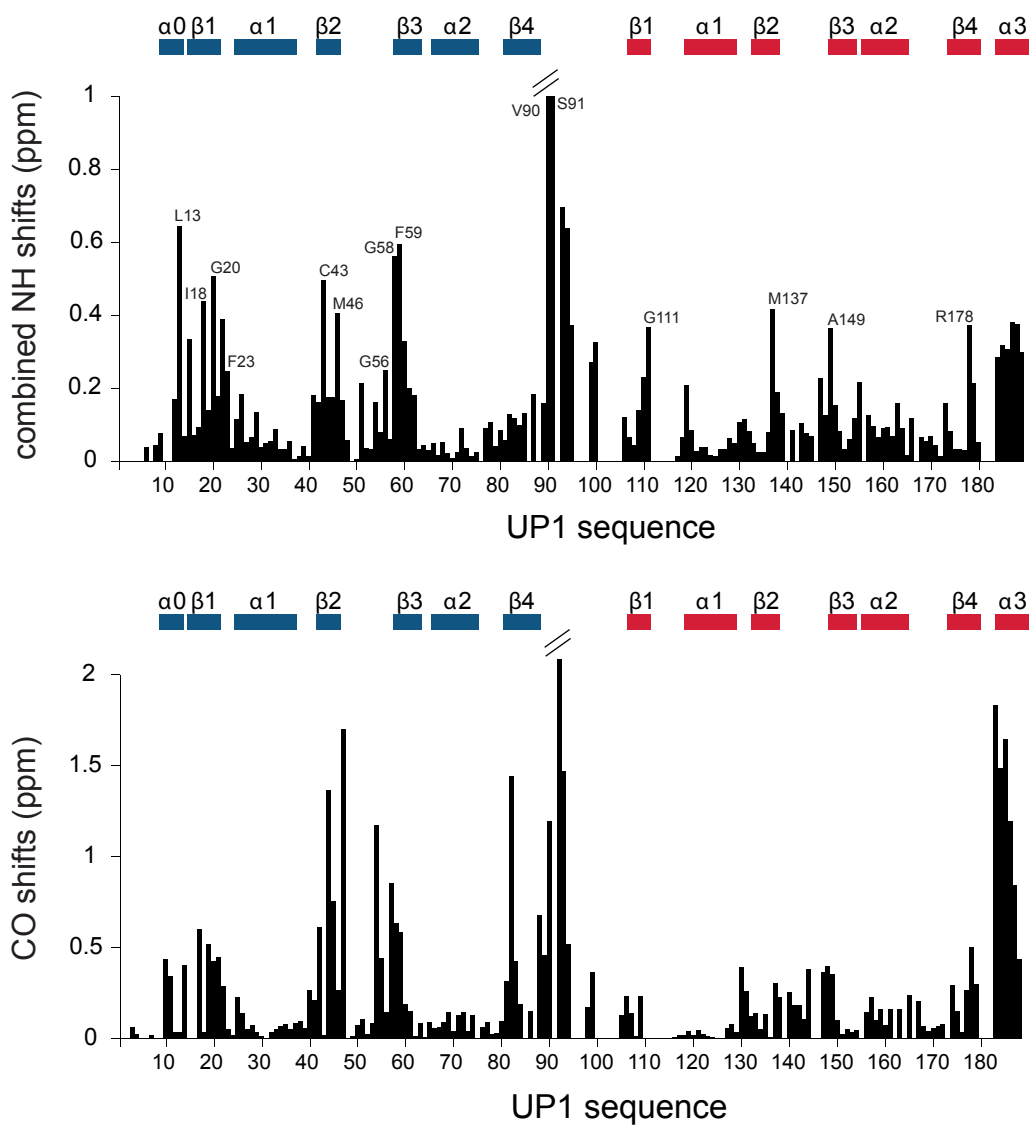

Figure 4 - figure supplement 1

Supplement: supp [file elife_poa_e25736_Figure_4_figure_supplement_1.pdf › elife_poa_e25736_Figure_4_figure_supplement_1.pdf]

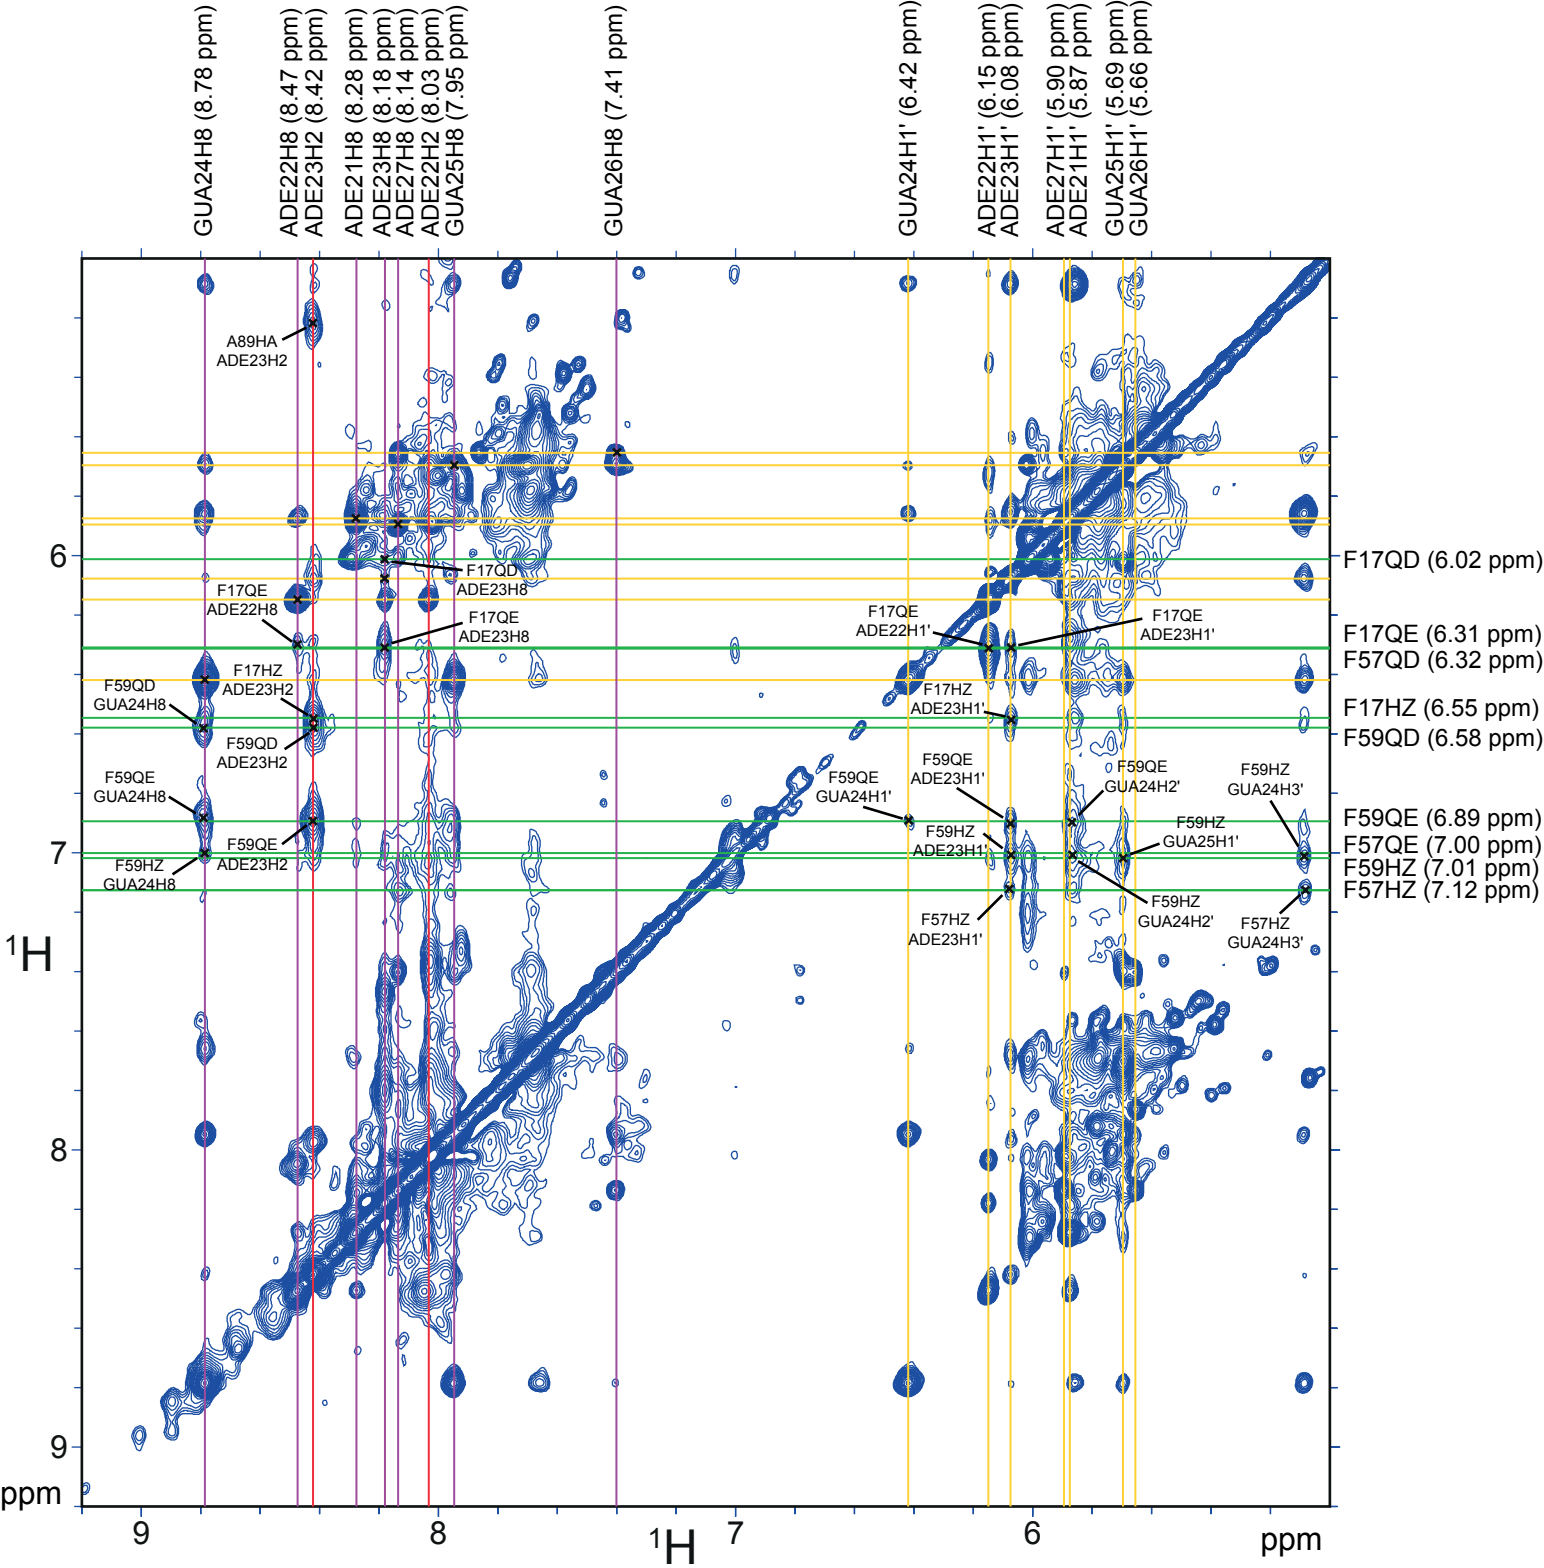

Figure 4 - figure supplement 2

Supplement: supp [file elife_poa_e25736_Figure_4_figure_supplement_2.pdf › elife_poa_e25736_Figure_4_figure_supplement_2.pdf]

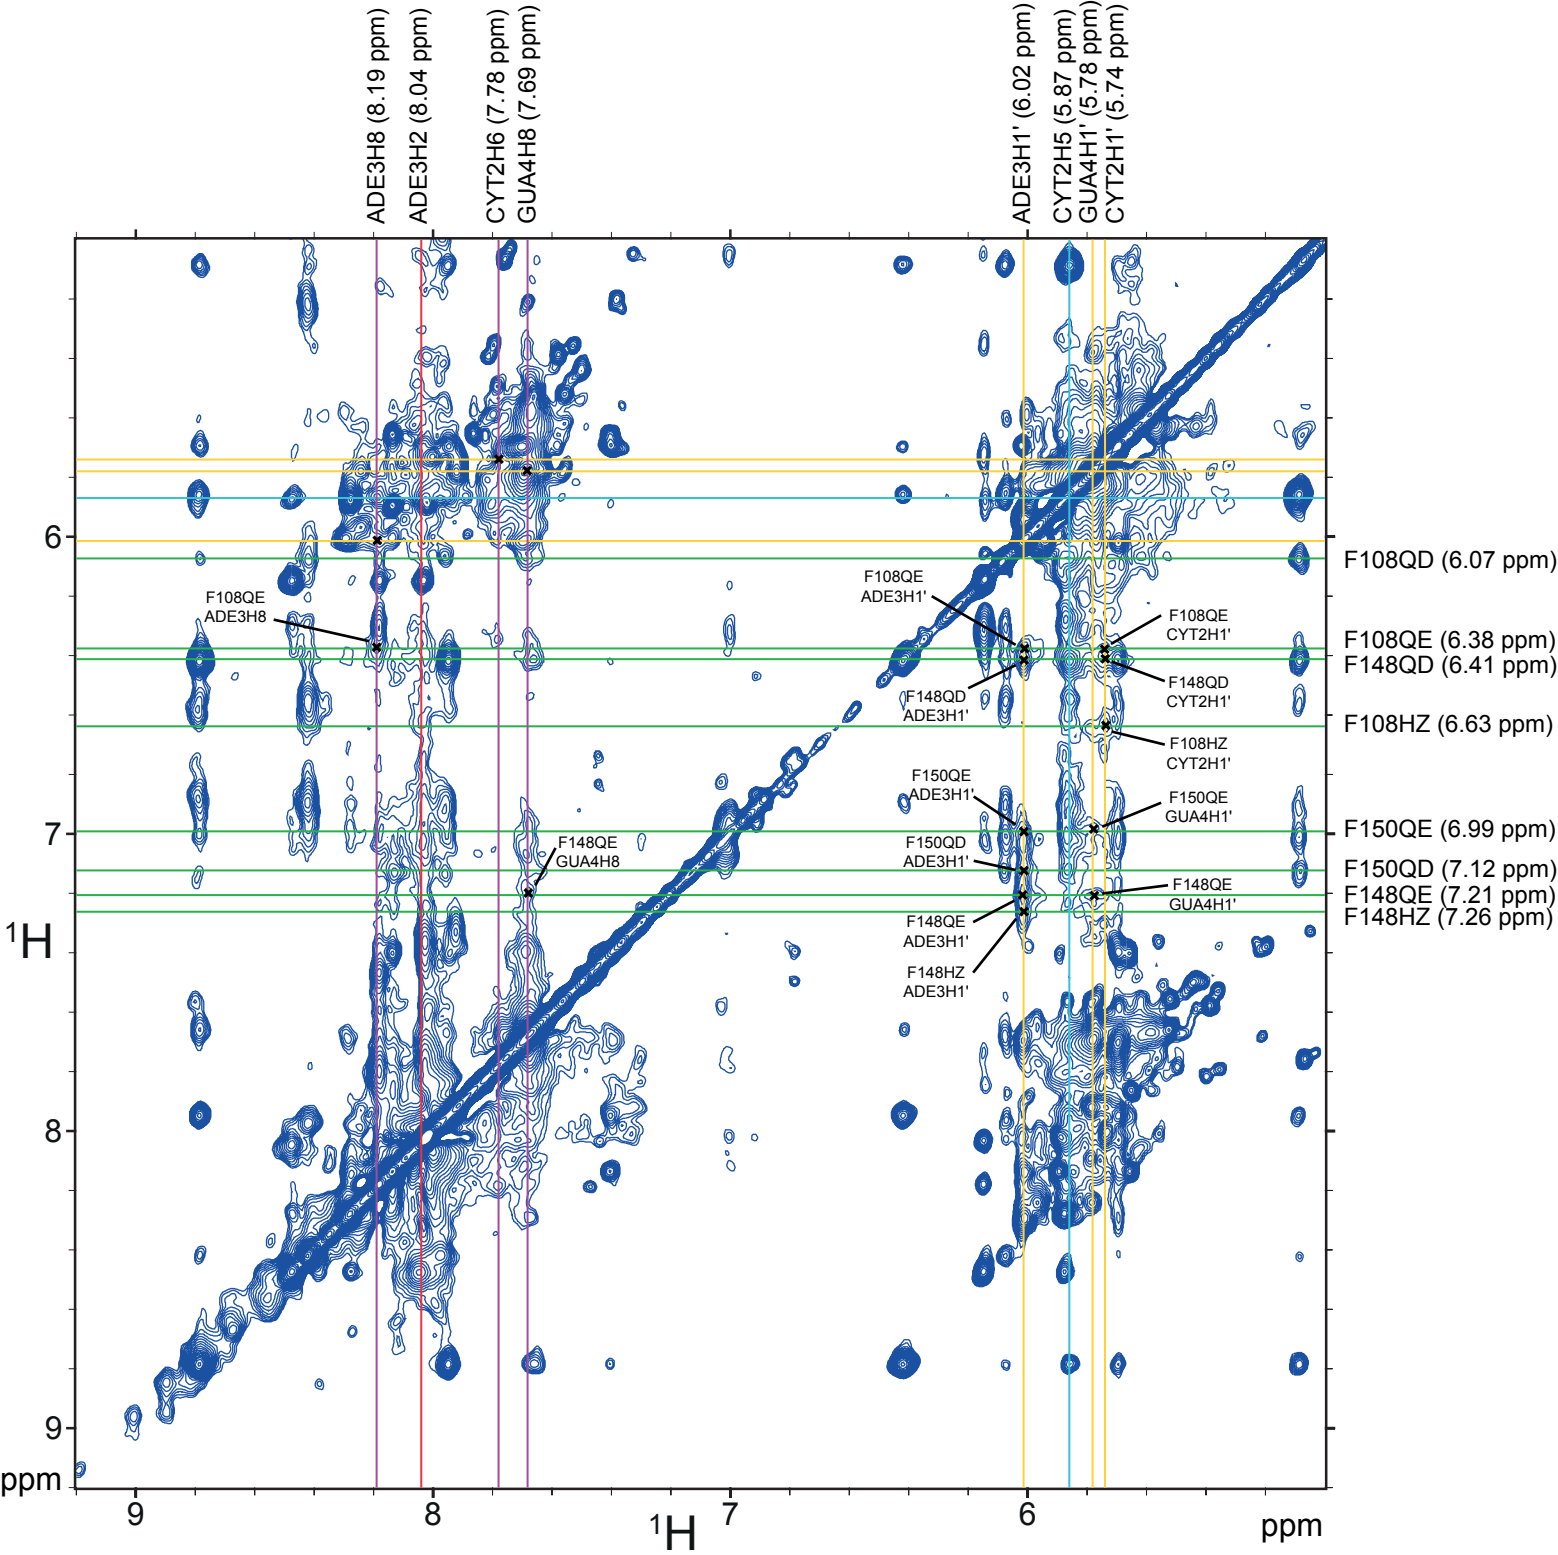

Figure 4 - figure supplement 3

Supplement: supp [file elife_poa_e25736_Figure_4_figure_supplement_3.pdf › elife_poa_e25736_Figure_4_figure_supplement_3.pdf]

**A**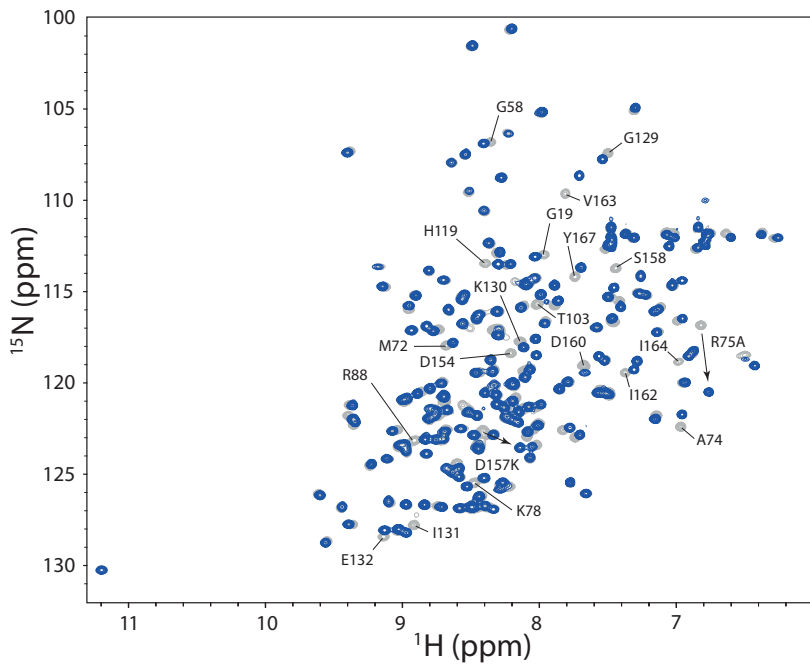**B**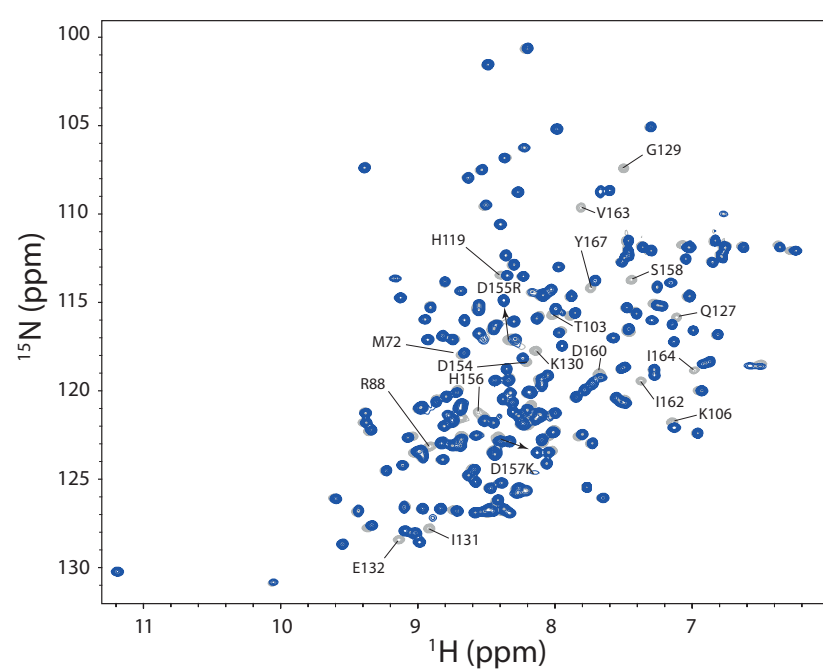**C**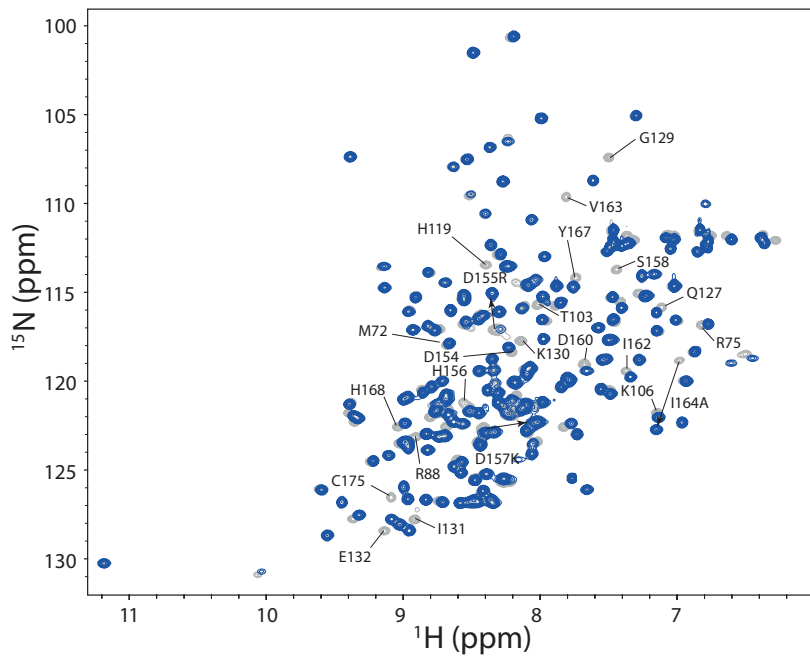**D**

|           | T1 (ms)      | T2 (ms)    | T1/T2          | $\tau_c$ (ns)  |
|-----------|--------------|------------|----------------|----------------|
| UP1-WT    | $660 \pm 20$ | $50 \pm 3$ | $13.4 \pm 1.0$ | $11.3 \pm 0.5$ |
| UP1-INT1  | $630 \pm 30$ | $66 \pm 4$ | $9.7 \pm 0.8$  | $9.5 \pm 0.4$  |
| UP 1-INT2 | $590 \pm 20$ | $63 \pm 5$ | $9.5 \pm 0.8$  | $9.3 \pm 0.4$  |
| UP 1-INT3 | $665 \pm 20$ | $58 \pm 4$ | $11.5 \pm 0.8$ | $10.5 \pm 0.5$ |

Supplement: supp [file elife_poa_e25736_Figure_5_figure_supplement_1.pdf › elife_poa_e25736_Figure_5_figure_supplement_1.pdf]

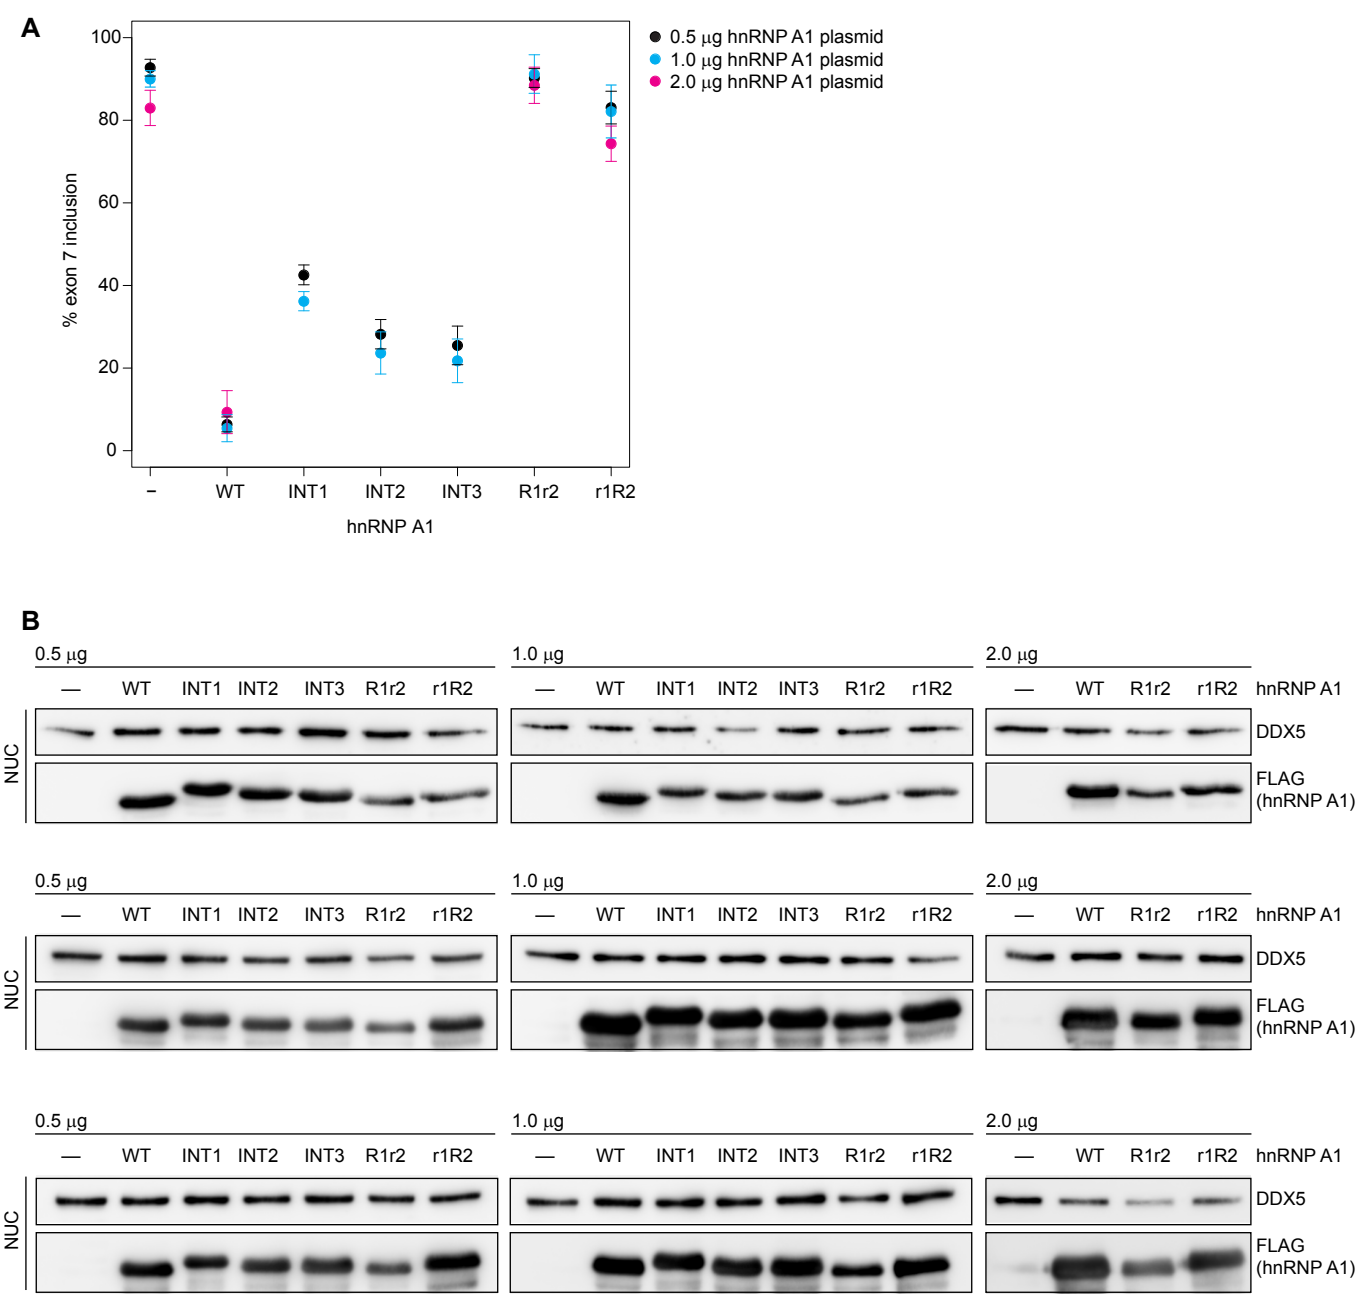

Figure 5 - figure supplement 2

Supplement: supp [file elife_poa_e25736_Figure_5_figure_supplement_2.pdf › elife_poa_e25736_Figure_5_figure_supplement_2.pdf]

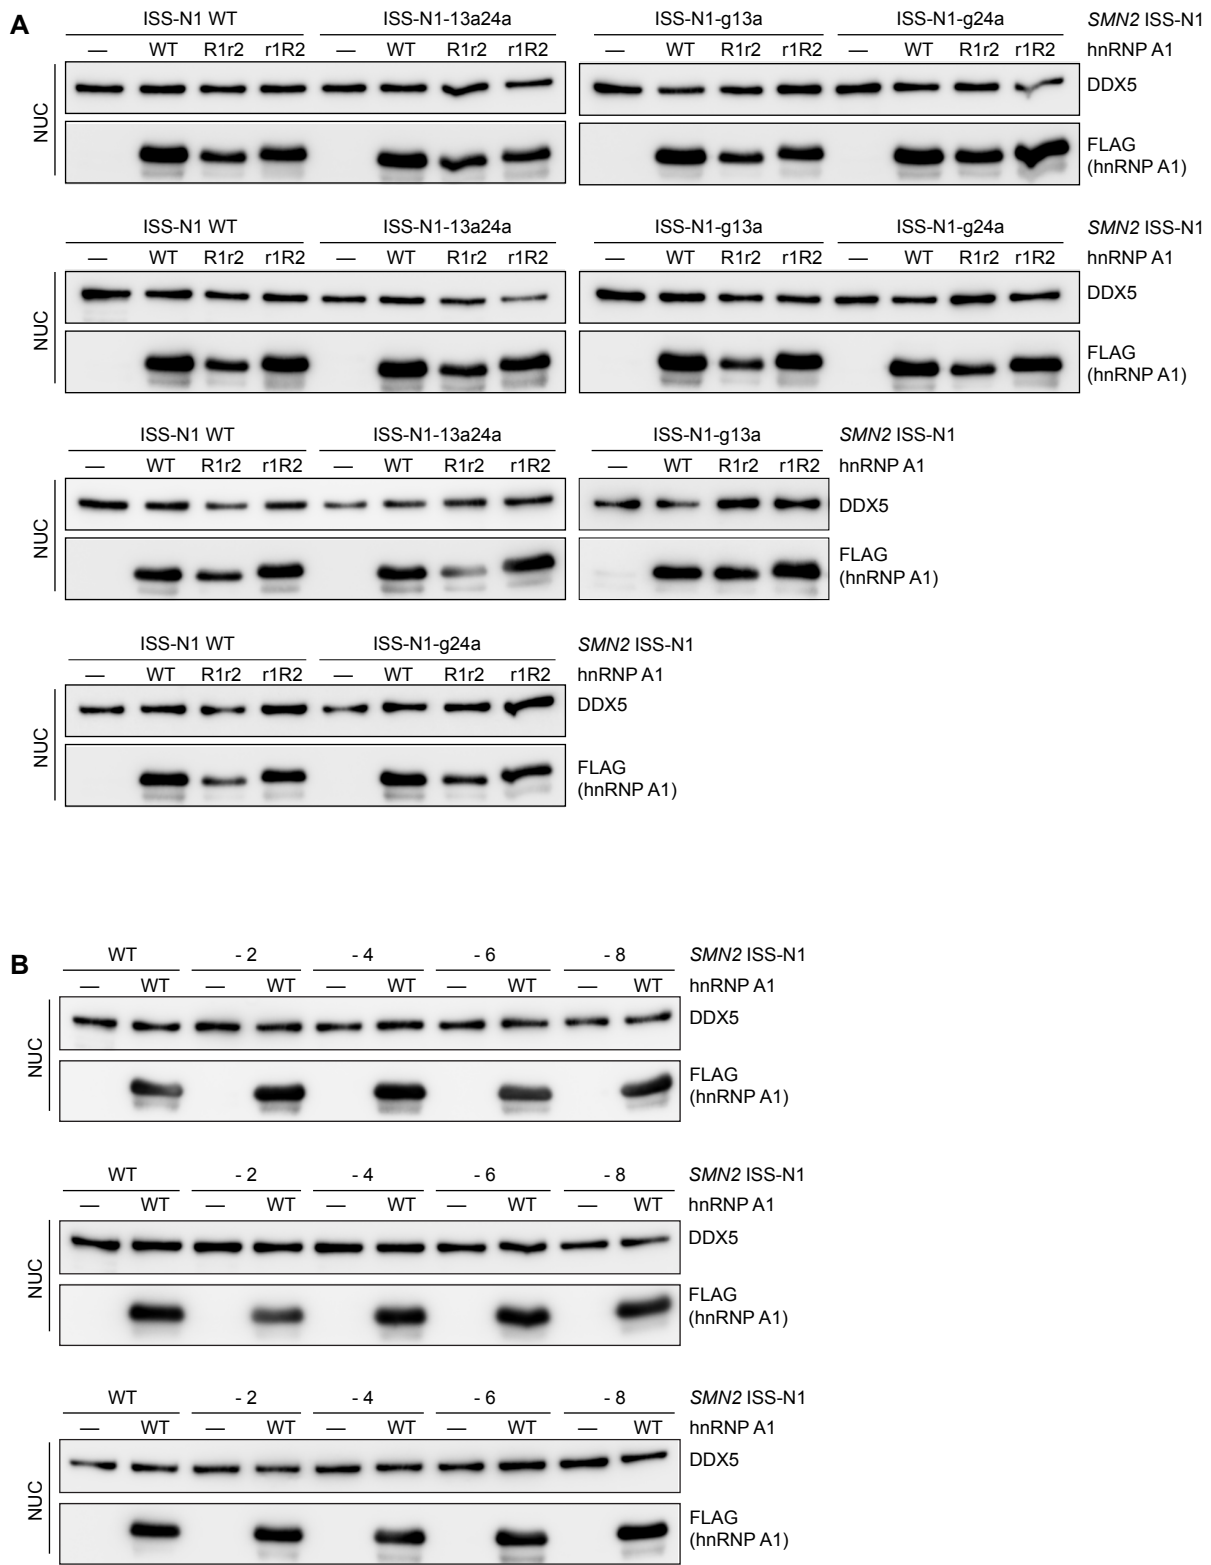

Figure 5 - figure supplement 3

Supplement: supp [file elife_poa_e25736_Figure_5_figure_supplement_3.pdf › elife_poa_e25736_Figure_5_figure_supplement_3.pdf]

**A**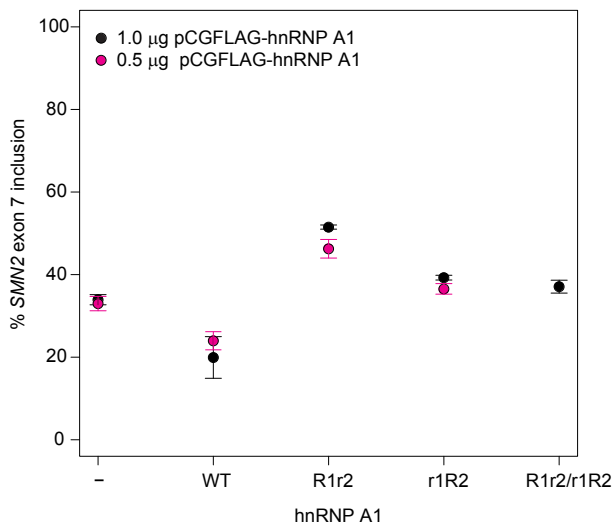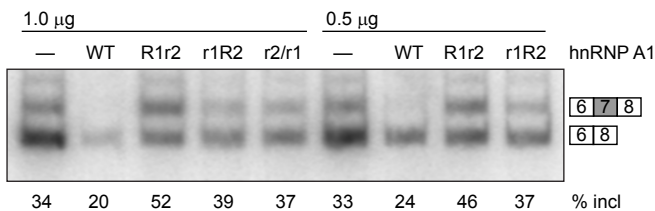**B**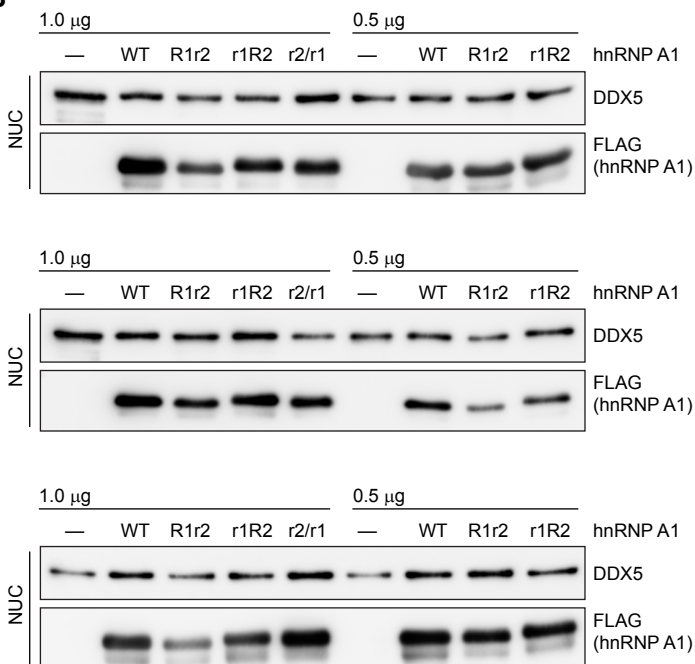

Supplement: supp [file elife_poa_e25736_Figure_5_figure_supplement_4.pdf › elife_poa_e25736_Figure_5_figure_supplement_4.pdf]
